# Supplementary material for: An optimised sample preparation method for NMR-based faecal metabonomic analysis
Source: Royal Society of Chemistry journal article supplement (doi:10.1039/b927543f), 2010-01-01
Supplement: b927543f.pdf [file b927543f.pdf]

Fig. S1

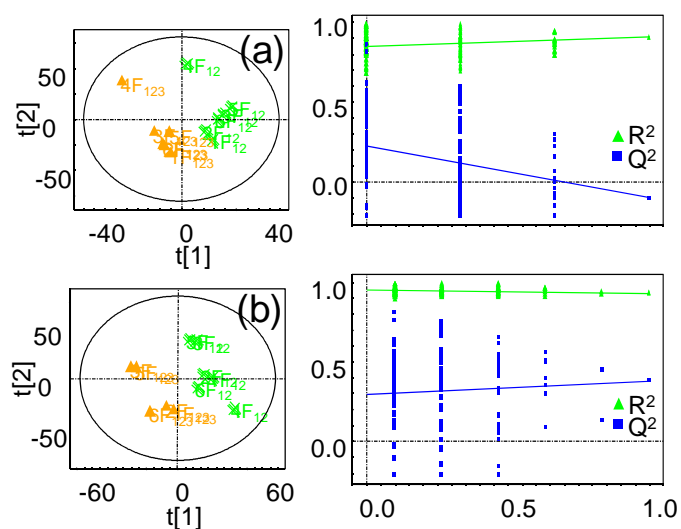

Fig. S1 PLS-DA scores plots (left) and its corresponding permutation tests (right) obtained from two combined faecal extracts (F<sub>12</sub> and F<sub>123</sub>) with W<sub>f</sub>:V<sub>b</sub> ratio of 1:10. (a) 5 sonication cycles; (b) 10 sonication cycles. F<sub>12</sub> denotes the combination of the first two extracts and F<sub>123</sub> is the combination of the first, second and third extracts.

Fig. S2

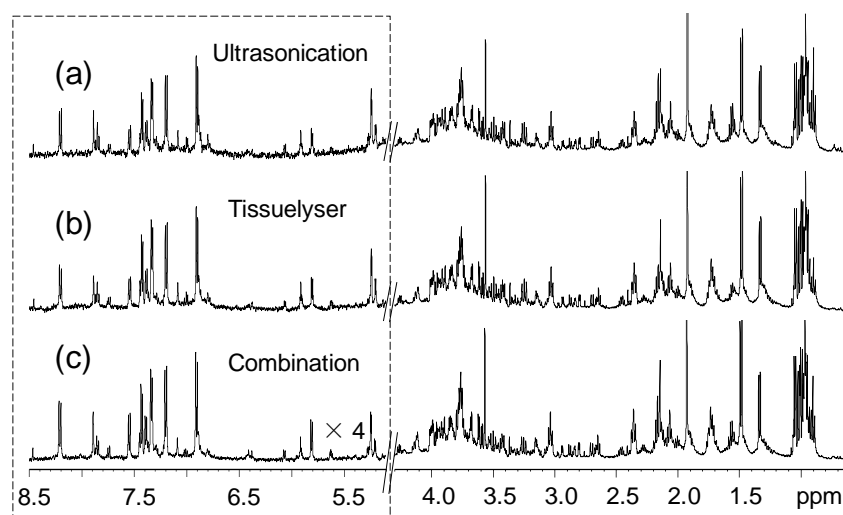

Fig. S2 500 MHz <sup>1</sup>H NMR spectra of the first faecal extracts obtained from three homogenisation methods. The spectra in the region ( $\delta$  5.1-8.5) were vertically expanded 4 times compared with the region ( $\delta$  0.6-4.3). (a) Ultrasonication. (b) Tissuelyser. (c) Combination of both treatments.

Fig. S3

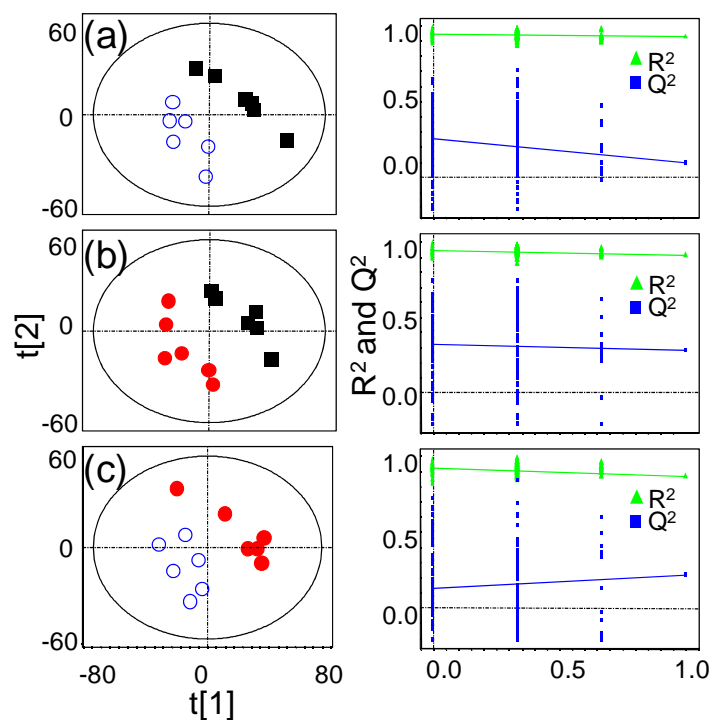

Fig. S3 PLS-DA scores plots (left) of the first faecal extracts and corresponding results from permutation tests from three different extraction methods.  $F^U_1$  (■);  $F^T_1$  (○);  $F^{UT}_1$  (●). (a)  $F^U_1$  vs.  $F^T_1$ ; (b)  $F^T_1$  vs.  $F^{UT}_1$ ; (c)  $F^T_1$  vs.  $F^{UT}_1$ .  $F^U_1$ ,  $F^T_1$  and  $F^{UT}_1$  denote the first extracts obtained from ultrasonication, tissuelyser and the combination of both treatments, respectively.

Fig. S4

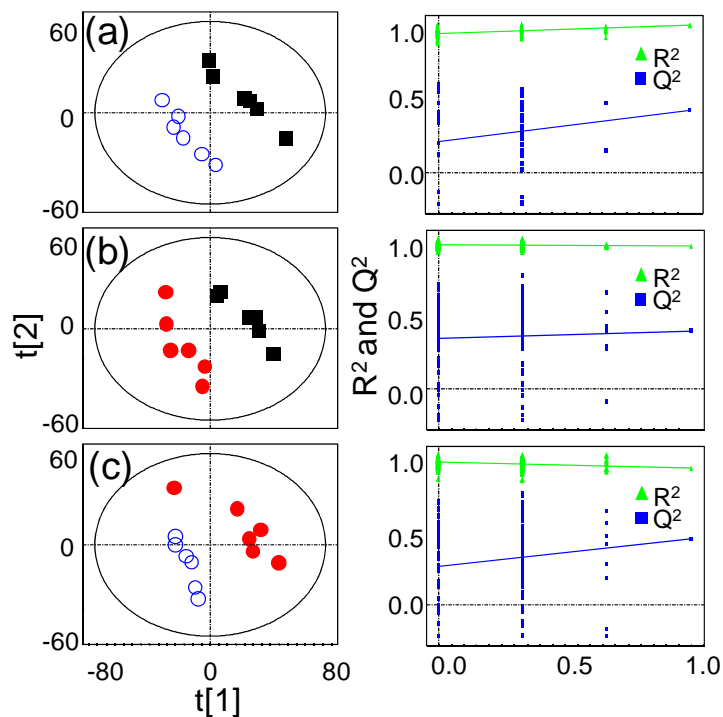

Fig. S4 PLS-DA scores plots (left) of the combined first two extracts and corresponding results from permutation tests (right) from three different extraction methods.  $F_{12}^U$  (■);  $F_{12}^T$  (○);  $F_{12}^{UT}$  (●). (a)  $F_{12}^U$  vs.  $F_{12}^T$ ; (b)  $F_{12}^U$  vs.  $F_{12}^{UT}$ ; (c)  $F_{12}^T$  vs.  $F_{12}^{UT}$ .  $F_{12}^U$ ,  $F_{12}^T$  and  $F_{12}^{UT}$  denote the first two extracts obtained from ultrasonication, tissuelyser and the combination of both treatments, respectively.
